# Supplementary material for: Safety and Effectiveness of Sodium–Glucose Cotransporter 2 Inhibitor Combined with Medical Nutrition Therapy for Hyperglycemia in Acute Stroke: A Retrospective Study
Source: MDPI journal article supplement (doi:10.3390/metabo12010025), 2021-12-28
Supplement: s1 [file s1]

Supplementary Materials

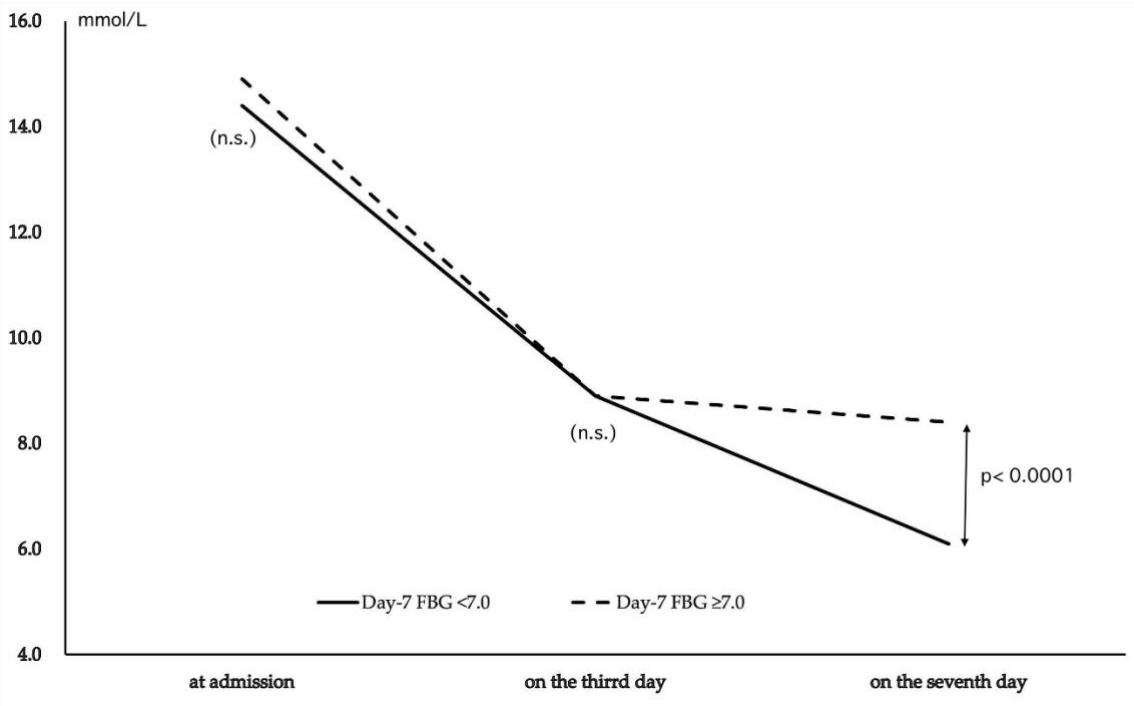

**Figure S1.** Serial changes of blood glucose levels in the Day-7 FBG <7.0 and Day-7 FBG ≥7.0 groups. FBG, fasting blood glucose; n.s., not significant; p, probability

**Table S1.** Stroke subtypes.

| Classification                        | N  |
|---------------------------------------|----|
| Transient ischemic attack             | 1  |
| Small-vessel occlusion (lacune)       | 19 |
| Large-artery atherosclerosis          | 17 |
| Cardiogenic stroke                    | 3  |
| Stroke of undetermined etiology       | 8  |
| Hypertensive intracerebral hemorrhage | 3  |

N, number

**Table S2.** Diabetes medications used prior to admission.

|                          |            |
|--------------------------|------------|
| N                        | 51 (100%)  |
| None                     | 28 (54.9%) |
| DPP4                     | 2 (3.9%)   |
| SU                       | 4 (7.8%)   |
| Big                      | 1 (2.0%)   |
| Big+SU                   | 3 (5.9%)   |
| DPP4+Big                 | 6 (11.8%)  |
| DPP4+SU                  | 2 (3.9%)   |
| DPP4+Big+SU              | 3 (5.9%)   |
| DPP4+SU+SGLT2i           | 1 (2.0%)   |
| DPP4+Big+SU+ $\alpha$ GI | 1 (2.0%)   |

$\alpha$ GI, alpha-glucosidase inhibitor; Big, biguanide; DPP4, dipeptidyl peptidase-4 inhibitors; N, number; SGLT2i, sodium-glucose cotransporter 2 inhibitors; SU, sulfonylurea

**Table S3.** Total energy-restriction diet for hospitalization.

| Target total energy                           | A total energy-restricted diet |
|-----------------------------------------------|--------------------------------|
| 1,000 kcal ≤ target total energy < 1,200 kcal | 1,000 kcal/day                 |
| 1,200 kcal ≤ target total energy < 1,400 kcal | 1,200 kcal/day                 |
| 1,400 kcal ≤ target total energy < 1,600 kcal | 1,400 kcal/day                 |
| 1,600 kcal ≤ target total energy < 1,800 kcal | 1,600 kcal/day                 |
| 1,800 kcal ≤ target total energy < 2,000 kcal | 1,800 kcal/day                 |

**Table S4.** SGLT2i use during hospitalization.

| SGLT2i                                                 | N  |
|--------------------------------------------------------|----|
| Luseogliflozin hydrate 2.5 mg per day                  | 26 |
| Dapagliflozin propylene glycolate hydrate 5 mg per day | 17 |
| Canagliflozin hydrate 100 mg per day                   | 8  |
| Total                                                  | 51 |

N, number; SGLT2i, sodium-glucose cotransporter 2 inhibitors

**Table S5.** Diabetes medications except for SGLT2i used during hospitalization.

|                       |            |
|-----------------------|------------|
| N                     | 51 (100%)  |
| None                  | 9 (17.7%)  |
| DPP4                  | 16 (31.4%) |
| Big                   | 1 (2.0%)   |
| LIA                   | 1 (2.0%)   |
| DPP4+Big              | 11 (21.6%) |
| DPP4+ $\alpha$ GI     | 3 (5.9%)   |
| DPP4+LIA              | 4 (7.8%)   |
| DPP4+Big+ $\alpha$ GI | 3 (5.9%)   |
| DPP4+Big+LIA          | 3 (5.9%)   |

$\alpha$ GI, alpha-glucosidase inhibitor; Big, biguanide; DPP4, dipeptidyl peptidase-4 inhibitors; LIA, long-acting insulin analog; N, number; SGLT2i, sodium-glucose cotransporter 2 inhibitors

**Table S6.** Evaluation of groupwise changes in blood glucose levels by the Wilcoxon rank-sum test.

|                         | Day-7 FBG <7.0    | Day-7 FBG ≥7.0    | <i>P</i> -value    |
|-------------------------|-------------------|-------------------|--------------------|
| BG at admission, mmol/L | 14.4 (12.4, 17.1) | 14.9 (12.5, 17.1) | n.s.               |
| FBG on day 3, mmol/L    | 8.9 (7.3, 10.6)   | 8.9 (7.3, 10.4)   | n.s.               |
| FBG on day 7, mmol/L    | 6.1 (5.1, 6.5)    | 8.4 (7.5, 9.1)    | <b>&lt; 0.0001</b> |

All values are presented as median (interquartile range). Boldface indicates significance. BG, blood glucose; Day-7 FBG, FBG level on day 7; FBG, fasting blood glucose; n.s., not significance; *P*, probability

**Table S7.** Evaluation of groupwise changes in blood glucose levels by the Wilcoxon signed-rank test.

| Group                  | At admission      |                    | On day 3        |                    | On day 7       |
|------------------------|-------------------|--------------------|-----------------|--------------------|----------------|
| Day-7 FBG <7.0, mmol/L | 14.4 (12.4, 17.1) | →                  | 8.9 (7.3, 10.6) | →                  | 6.1 (5.1, 6.5) |
| <i>P</i> -value        |                   | <b>&lt; 0.0001</b> |                 | <b>&lt; 0.0001</b> |                |
| Day-7 FBG ≥7.0, mmol/L | 14.9 (12.5, 17.1) | →                  | 8.9 (7.3, 10.4) | →                  | 8.4 (7.5, 9.1) |
| <i>P</i> -value        |                   | <b>&lt; 0.0001</b> |                 | ns                 |                |

All values are presented as median (interquartile range). Boldface indicates significance.

FBG, fasting blood glucose



**Table S8.** Intergroup comparison of age, male sex, BMI, and biomarkers at admission.

|                                                 | Day-7 FBG <7.0    | Day-7 FBG ≥7.0    | <i>P</i> -value |
|-------------------------------------------------|-------------------|-------------------|-----------------|
| N                                               | 33                | 18                |                 |
| Age, years                                      | 69 (62.5, 76)     | 74 (66.5, 79.3)   | <b>0.0473</b>   |
| Sex, n (%)                                      | Male:25 (75.8%)   | Male:12 (66.7%)   | 0.4905          |
|                                                 | Female:8 (24.2%)  | Female:6 (33.33%) |                 |
| BMI, kg/m <sup>2</sup>                          | 24.5 (23, 27.4)   | 23.4 (20.5, 27.3) | 0.3696          |
| Cre, mmol/L                                     | 72.5 (56.6, 83.5) | 70.3 (60.1, 91.3) | 0.5345          |
| eGFR, mL·min <sup>-1</sup> ·m <sup>-2</sup> BSA | 68.4 (63.0, 85.2) | 65.2 (47.3, 81.8) | 0.2489          |
| hs-CRP, µg/L                                    | 1900 (500, 4750)  | 1800 (775, 3150)  | 0.9528          |

Boldface indicates significance. BMI, body mass index; BSA, body surface area; Cre, creatinine; Day-7 FBG, FBG level on day 7, mmol/L; eGFR, estimated glomerular filtration rate; FBG, fasting blood glucose; hs-CRP, high-sensitivity C-reactive protein; N, number, *P*, probability

**Table S9.** Intergroup comparison of DPP4, SU, Big,  $\alpha$ GI, and SGLT2i use prior to admission.

|                | Day-7 FBG <7.0, mmol/L | Day-7 FBG $\geq$ 7.0, mmol/L | P-value       |
|----------------|------------------------|------------------------------|---------------|
| N              | 33                     | 18                           |               |
| DPP4           | 7                      | 8                            | 0.0856        |
| No DPP4        | 26                     | 10                           |               |
| SU             | 5                      | 9                            | <b>0.0085</b> |
| No SU          | 28                     | 9                            |               |
| Big            | 8                      | 6                            | 0.4905        |
| No Big         | 25                     | 12                           |               |
| $\alpha$ GI    | 1                      | 0                            | 0.3478        |
| No $\alpha$ GI | 32                     | 18                           |               |
| SGLT2i         | 0                      | 1                            | 0.1454        |
| No SGLT2i      | 33                     | 17                           |               |

Boldface indicates significance.

$\alpha$ GI, alpha-glucosidase inhibitor; Big, biguanide; Day-7 FBG, FBG level on day 7; DPP4, dipeptidyl peptidase-4 inhibitors; FBG, fasting blood glucose; N, number; SU, sulfonylurea

**Table S10.** Intergroup comparison of diabetes medications used during hospitalization except for SGLT2i.

|                       | Day-7 FBG <7.0, mmol/L | Day-7 FBG ≥7.0, mmol/L | N (%)      |
|-----------------------|------------------------|------------------------|------------|
| N                     | 33                     | 18                     | 51 (100%)  |
| None                  | 8                      | 1                      | 9 (17.6%)  |
| DPP4                  | 11                     | 5                      | 16 (31.4%) |
| Big                   | 1                      | 0                      | 1 (2.0%)   |
| DPP4+Big              | 7                      | 4                      | 11 (21.6%) |
| DPP4+ $\alpha$ GI     | 1                      | 2                      | 3 (5.9%)   |
| DPP4+Big+ $\alpha$ GI | 1                      | 2                      | 3 (5.9%)   |
| LIA                   | 1                      | 0                      | 1 (2.0%)   |
| DPP4+LIA              | 2                      | 2                      | 4 (7.8%)   |
| DPP4+Big+LIA          | 1                      | 2                      | 3 (5.9%)   |

$\alpha$ GI, alpha-glucosidase inhibitor; Big, biguanide; Day-7 FBG, FBG level on day 7; DPP4, dipeptidyl peptidase-4 inhibitors; FBG, fasting blood glucose; LIA, long-acting insulin analog; N, number

**Table S11.** Intergroup comparison of DPP4, Big,  $\alpha$ GI, and LIA used during hospitalization.

|                | Day-7 FBG <7.0, mmol/L | Day-7 FBG $\geq$ 7.0, mmol/L | P-value       |
|----------------|------------------------|------------------------------|---------------|
| N              | 33                     | 18                           |               |
| DPP4           | 23                     | 17                           | <b>0.0257</b> |
| No DPP4        | 10                     | 1                            |               |
| Big            | 10                     | 8                            | 0.3155        |
| No Big         | 23                     | 10                           |               |
| $\alpha$ GI    | 2                      | 4                            | 0.0951        |
| No $\alpha$ GI | 31                     | 14                           |               |
| LIA            | 4                      | 4                            | 0.3519        |
| No LIA         | 29                     | 14                           |               |

Boldface indicates significance.

$\alpha$ GI, alpha-glucosidase inhibitor; Big, biguanide; Day-7 FBG, FBG level on day 7; DPP4, dipeptidyl peptidase-4 inhibitors; FBG, fasting blood glucose; LIA, long-acting insulin analog; N, number

**Table S12.** Variance inflation factor of variables for multiple logistic regression analysis.

|        | VIF  |
|--------|------|
| Age    | 1.07 |
| SU use | 1.07 |

SU, sulfonylurea; VIF, variance inflation factor

**Table S13.** Multiple logistic regression for Day-7 FBG<7.0 using receiver operating characteristic curves (N=676).

|                                 | Odds ratio        | <i>P</i> -value | AUC   | BIC  |
|---------------------------------|-------------------|-----------------|-------|------|
|                                 |                   | 0.0084          | 0.736 | 68.5 |
| Age                             | 0.94 (0.86, 1.01) | 0.1044          |       |      |
| SU use (0=no SU use, 1= SU use) | 0.23 (0.05, 0.86) | <b>0.0290</b>   |       |      |

AUC, area under the curve; BIC, Bayesian information criterion; Day-7 FBG, FBG level on day 7;

FBG, fasting blood glucose; *P*, probability; SU, sulfonylurea
